# Supplementary material for: Variations in antibody repertoires correlate with vaccine responses
Source: HighWire-hosted journal article supplement (doi:10.1101/gr.276027.121), 2022-03-31
Supplement: Supplemental_Table_S2.xlsx [file Supplemental_Table_S2.xlsx]

## Sheet: Legend
Supplemental Table S2. Known alleles of cattle V genes. We included V genes that have (i) two and more variants and (ii) average usage exceeding 0.001. V gene sequences were extracted from the IMGT database and genome assemblies of Angus and Hereford breeds available under accession numbers GCF_003369695.1 and CM008188.2, respectively.

## Sheet: Known alleles of cattle V genes
Gene	Allele name	Sequence
IGHV1-7	01-IMGT	CAGGTGCAGCTGCGGGAGTCGGGCCCCAGCCTGGTGAAGCCGTCACAGACCCTCTCCCTCACCTGCACGGTCTCTGGATTCTCATTGAGCGACAAGGCTGTAGGCTGGGTCCGCCAGGCTCCAGGGAAGGCGCTGGAGTGGCTCGGTGGTATAGACACTGGTGGAAGCACAGGCTATAACCCAGGCCTGAAATCCCGGCTCAGCATCACCAAGGACAACTCCAAGAGCCAAGTCTCTCTGTCAGTGAGCAGCGTGACAACTGAGGACTCGGCCACATACTACTGTACTACTGTGCACCAGA
	02-IMGT	CAGGTGCAGCTGCGGGAGTCGGGCCCCAGCCTGGTGAAGCCCTCACAGACCCTCTCGCTCACCTGCACGGCCTCTGGATTCTCATTGAGCGACAAGGCTGTAGGCTGGGTCCGCCAGGCTCCAGGGAAGGCGCTGGAGTGGCTCGGTGGTATAGACACTGGTGGAAGCACAGGCTATAACCCAGGCCTGAAATCCCGGCTCAGCATCACCAAGGACAACTCCAAGAGCCAAGTCTCTCTGTCAGTGAGCAGCGTGACAACTGAGGACTCGGCCACATACTACTGTACTACTGTGCACCAGA
	Angus	CAGGTGCAGCTGCGGGAGTCGGGCCCCAGCCTGGTGAAGCCGTCACAGACCCTCTCGCTCACCTGCACGGCCTCTGGATTCTCATTAAGCGACAAGGCTGTAGGCTGGGTCCGCCAGGCTCCAGGAAAGGCGCTGGAGTGGCTCGGTGGTATAGACACTGGTGGAAGCACAGGCTATAACCCAGGCCTGAAATCCCGGCTCAGCATCACCAAGGACAACTCCAAGAGCCAAGTCTCTCTGTCAGTGAGCAGCGTGACAACTGAGGACTCGGCCACATACTACTGTACTACTGTGCACCAGA
IGHV1-10	01-IMGT	CAGGTGCAGCTGCGGGAGTCGGGCCCCAGCCTGGTGAAGCCCTCACAGACCCTCTCCCTCACCTGCACGGTCTCTGGATTCTCATTGAGCAGCTATGGTGTAGGCTGGGTCCGCCAGGCTCCAGGGAAGGCGCTGGAGTGTCTTGGTGGTATAAGTAGTGGTGGAAGCACAGGCTATAACCCAGCCCTGAAATACCGGCTCAGCATCACCAAGGACAACTCCAAGAGCCAAGTCTCTCTGTCACTGAGCAGCGTGACAACTGAGGACACGGCCACATACTACTGTGCGAAGGA
	02-IMGT	CAGGTGCAGCTGCGGGAGTCGGGCCCCAGCCTGGTGAAGCCCTCACAGACCCTCTCCCTCACCTGCACGGTCTCTGGATTCTCATTGAGCAGCTATGGTGTAGGCTGGGTCCGCCAGGCTCCAGGGAAGGCGCTGGAGTGTCTTGGTGGTATAAGTAGTGGTGGAAGCACAGGCTATAACCCAGCCCTGAAATCCCGGCTCAGCATCACCAAGGACAACTCCAAGAGCCAAGTCTCTCTGTCACTGAGCAGCGTGACAACTGAGGACACAGCCACATACTACTGT
	Hereford	CAGGTGCAGCTGCGGGAGTCGGGCCCCAGCCTGGTGAAGCCCTCACAGACCCTCTCCCTCACCTGCACGGTCTCTGGATTCTCATTGAGCAGCTATGGTGTAGGCTGGGTCCGCCAGGCTCCAGGGAAGGCGCTGGAGTGTCTTGGTGGTATAAGTAGTGGTGGAAGCACAGGCTATAACCCAGCCCTGAAATCCCGGCTCAGCATCACCAAGGACAACTCCAAGAGCCAAGTCTCTCTGTCACTGAGCAGCGTGACAACTGAGGACACGGCCACATACTACTGTGCGAAGGA
IGHV1-14	01-IMGT	CAGGTGCAGCTGCGGGAGTCGGGCCCCAGCCTGGTGAAGCCCTCACAGACCCTGTCCCTCACCTGCACGGTCTCTGGATTCTCATTAAGCGATAATAGTGTAGGCTGGGTCCGCCAGGCTCCAGGAAAGGCGCTGGAGTGGCTCGGTGTCATATATAGTGGTGGAAGCACAGGCTATAACCCAGCCCTGAAATCCCGGCTCAGCATCACCAAGGACAACTCCAAGAGCCAAGTCTCTCTATCACTGAGCAGCGTGACAACTGAGGACACGGCCACATACTACTGTGCAAGAGA
	02-IMGT	CAGGTGCAGCTGCGGGAGTCGGGCCCCAGCCTGGTGAAGCCCTCACAGACCCTCTCCCTCACCTGCACGGTCTCTGGATTCTCATTAAGCGATAATAGTGTAGGCTGGGTCCGCCAGGCTCCAGGAAAGGCGCTGGAGTGGCTCGGTGTCATATATAGTGGTGGAAGCACAGGCTATAACCCAGCCCTGAAATCCCGGCTCAGCATCACCAAGGACAACTCCAAGAGCCAAGTCTCTCTATCACTGAGCAGCGTGACAACTGAGGACACGGCCACATACTACTGTGCAAGAGA
	03-IMGT	CAGGTGCAGCTGCGGGAGTCGGGCCCCAGCCTGGTGAAGCCCTCACAGACCCTCTCCCTCACCTGCACGGTCTCTGGATTCTCATTGAGCAGCTATGCTGTAAGCTGGGTCCGCCAGGCTCCAGGGAAGGCGCTGGAGTGGCTCGGTGTCATATATAGTGGTGGAAACACAGGCTATAACCCAGCCCTGAAATCCCGGCTCAGCATCACCAAGGACAACTCCAAGAGCCAAGTCTCTCTATCACTGAGCAGCGTGACAACTGAGGACACAGCCACATACTACTGT
IGHV1-17	01-IMGT	CAGGTGCAGCTGCGCGAGTCGGGCCCCAGCCTGGTGAAGCCCTCACAGACCCTCTCCCTCACCTGCACGGTCTCTGGATTCTCATTGAGCAGCTATGCTGTAAGCTGGGTCCGCCAGGCTCCAGGGAAGGCTCTGGAGTGGCTTGGTGATATAAGCAGTGGTGGAAGCACAGGCTATAACCCAGCCCTGAAATCCCGGCTCAGCATCACCAAGGACAACTCCAAGAGCCAAGTCTCTCTGTCAGTGAGCAGCGTGACACCTGAGGACACGGCCACATACTACTGTGCGAAGGA
	Angus	CAGGTGCAGCTGCGGGAGTCGGGCCCCAGCCTGGTGAAGCCCTCACAGACCCTCTCCCTCACCTGCACGGTCTCTGGATTCTCATTGAGCAGCTATGCTGTAAGCTGGGTCCGCCAGGCTCCAGGGAAGGCGCTGGAGTGGCTTGGTGGTATAAGCAGTGGTGGAAGCACATGCCTATAACCCAGCCCTGAAATCCCGGCTCAGCATCACCAAGGACAACTCCAAGAGCCAAGTCTCTCTGTCAGTGAGCAGCGTGACACCTGAGGACACGGCCACATACTACTGTGCAAAGGA
	Hereford	CAGGTGCAGCTGCGCGAGTCGGGCCCCAGCCTGGTGAAGCCCTCACAGACCCTCTCCCTCACCTGCACGGTCTCTGGATTCTCATTGAGCAGCTATGCTGTAAGCTGGGTACGCCAGGCTCCAGGGAAGGCGCTGGAGTGGCTTGGTGATATAAGCAGTGGTGGAAGCACAGGCTATAACCCAGCCCTGAAATCCCGGCTCAGCATCACCAAGGACAACTCCAAGAGCCAAGTCTCTCTGTCAGTGAGCAGCGTGACACCTGAGGACACGGCCACATACTACTGTGCGAAGGA
IGHV1-20	01-IMGT	CAGGTGCAGCTGCGGGAGTCGGGCCCCAGCCTGGTGAAGCCCTCACAGACCCTCTCCCTCACCTGCACGGTCTCTGGATTCTCACTGAGCAGCTATGCTGTAGGCTGGGTCCGCCAGGCTCCAGGGAAGGCGCTGGAGTGGCTCGGTGGTATAAGCAGTGGTGGAAGCACATACTATAACCCAGCCCTGAAATCCCGGCTCAGCATCACCAAGGACAACTCCAAGAGCCAAGTCTCTCTGTCAGTGAGCAGCGTGACACCTGAGGACACGGCCACATACTACTGTGCGAAGGA
	02-IMGT	CAGGTGCAGCTGCGGGAGTCGGGCCCCAGCCTGGTGAAGCCCTCACAGACCCTCTCCCTCACCTGCACGGTCTCTGGATTCTCATTAAGCGATAATAGTGTAGGCTGGGTCCGCCAGGCTCCAGGGAAGGCGCTGGAGTGCCTCGGTGGTATAAGCAGTGGTGGAAGCACAGGCTATAACCCAGCCCTGAAATCCCGGCTCAGCATCACCAAGGACAACTCCAAGAGCCAAGTCTCTCTGTCAGTGAGCAGCGTGACACCTGAGGACACAGCCACATACTACTGT
IGHV1-21	01-IMGT	CAGGTGCAGCTGCGGGAGTCGGGCCCCAGCCTGGTGAAGCCCTCACAGACCCTCTCCCTCACCTGCACGATCTCTGGATTCTCATTGAGCAGCTATGCTGTAGGCTGGGTCCGCCAGGCTCCGGGGAAGGCGCTGGAGTGGGTTGGTGGTATAAGTAGTGGTGGAAGCACATGCCTTAACCCAGCCCTGAAATCCCGGCTCAGCATCACCAAGGACAACTCCAAGAGCCAAGTCTCTCTGTCAGTGAGCAGCGTGACAACTGAGGACACGGCCACATACTACTGTGCGAAGGA
	02-IMGT	CAGGTGCAGCTGCGGGAGTCGGGCCCCAGCCTGGTGAAGCCCTCACAGACCCTCTCCCTCACCTGCACGATCTCTGGATTCTCATTGAGCAGCTATGCTGTAGGCTGGGTCCGCCAGGCTCCGGGGAAGGCGCTGGAGTGGGTTGGTGGTATAAGTAGTGGTGGAAGCACATGCCTTAACCCAGCCCTGAAATCCCGGCTCAGCATCACCAAGGACAACTCCAAGAGCCAAGTCTCTCTGTCAGTGAGCAGCGTGACAACTGAGGACACAGCCACATACTACTGT
	03-IMGT	AAGGTGCAGCTGCAGGAGTCGGGTCCCAGCCTGGTGAAGCCCTCACAGACCCTCTCCCTCACCTGCACGGCCTCTGGATTCTCATTGAGCAGCTATGCTGTAGGCTGGGTCCGCCAGGCTCCGGGGAAGGCGCTGGAGTGGGTTGGTGGTATAAGTAGTGGTGGAAGCACATGCCTTAACCCAGCCCTGAAATCCCGGCTCAGCATCACCAAGGACAACTCCAAGAGCCAAGTCTCTCTGTCAGTGAGCAGCGTGACAACTGAGGACACAGCCACATACTACTGT
