# Supplementary material for: Variations in antibody repertoires correlate with vaccine responses
Source: HighWire-hosted journal article supplement (doi:10.1101/gr.276027.121), 2022-03-31
Supplement: Supplemental_Table_S3.xlsx [file Supplemental_Table_S3.xlsx]

## Sheet: Legend
Supplemental Table S3. Sequencing primers. The underlined nucleotides are oligo (dT) sequences in primer “SMARTer IIA Oligonucleotide”; specific target sequence of 5’ end VH leader sequence (CTCSAAGATGAACCCACTGTG) in primer ”87747”, and 6-digit index sequences for sequencing libraries in primer “87934_1–16”.

## Sheet: Sequencing primers
Primer name	Sequence
SMARTer IIA Oligonucleotide	AAGCAGTGGTATCAACGCAGAGTACTTTTTTTTTTTTTTTTTTTTTTTTTTTTTTVN
87747	AAGCAGTGGTATCAACGCAGAGTACGCTCSAAGATGAACCCACTGTG
87935	AATGATACGGCGACCACCGAGATCTACACTCTTTCCCTACACGACGCTCTTCCGATCTTTTCGGGGCTGTGGTGGASG
87934_1	CAAGCAGAAGACGGCATACGAGATGTCAAAGTGACTGGAGTTCAGACGTGTGCTCTTCCGATCCCCTCCTCTTTGTGCTSTCA
87934_2	CAAGCAGAAGACGGCATACGAGATGTGACAGTGACTGGAGTTCAGACGTGTGCTCTTCCGATCCCCTCCTCTTTGTGCTSTCA
87934_3	CAAGCAGAAGACGGCATACGAGATCATCATGTGACTGGAGTTCAGACGTGTGCTCTTCCGATCCCCTCCTCTTTGTGCTSTCA
87934_4	CAAGCAGAAGACGGCATACGAGATGCCGTTGTGACTGGAGTTCAGACGTGTGCTCTTCCGATCCCCTCCTCTTTGTGCTSTCA
87934_5	CAAGCAGAAGACGGCATACGAGATCGGCTTGTGACTGGAGTTCAGACGTGTGCTCTTCCGATCCCCTCCTCTTTGTGCTSTCA
87934_6	CAAGCAGAAGACGGCATACGAGATGTTCCGGTGACTGGAGTTCAGACGTGTGCTCTTCCGATCCCCTCCTCTTTGTGCTSTCA
87934_7	CAAGCAGAAGACGGCATACGAGATGTAGATGTGACTGGAGTTCAGACGTGTGCTCTTCCGATCCCCTCCTCTTTGTGCTSTCA
87934_8	CAAGCAGAAGACGGCATACGAGATCCTTCTGTGACTGGAGTTCAGACGTGTGCTCTTCCGATCCCCTCCTCTTTGTGCTSTCA
87934_9	CAAGCAGAAGACGGCATACGAGATTATGCTGTGACTGGAGTTCAGACGTGTGCTCTTCCGATCCCCTCCTCTTTGTGCTSTCA
87934_10	CAAGCAGAAGACGGCATACGAGATCAGGTAGTGACTGGAGTTCAGACGTGTGCTCTTCCGATCCCCTCCTCTTTGTGCTSTCA
87934_11	CAAGCAGAAGACGGCATACGAGATGTAGACGTGACTGGAGTTCAGACGTGTGCTCTTCCGATCCCCTCCTCTTTGTGCTSTCA
87934_12	CAAGCAGAAGACGGCATACGAGATGACGTTGTGACTGGAGTTCAGACGTGTGCTCTTCCGATCCCCTCCTCTTTGTGCTSTCA
87934_13	CAAGCAGAAGACGGCATACGAGATAGCATGGTGACTGGAGTTCAGACGTGTGCTCTTCCGATCCCCTCCTCTTTGTGCTSTCA
87934_14	CAAGCAGAAGACGGCATACGAGATATTCGAGTGACTGGAGTTCAGACGTGTGCTCTTCCGATCCCCTCCTCTTTGTGCTSTCA
87934_15	CAAGCAGAAGACGGCATACGAGATCATCGTGTGACTGGAGTTCAGACGTGTGCTCTTCCGATCCCCTCCTCTTTGTGCTSTCA
87934_16	CAAGCAGAAGACGGCATACGAGATGATCGTGTGACTGGAGTTCAGACGTGTGCTCTTCCGATCCCCTCCTCTTTGTGCTSTCA
